# Supplementary material
Source: PubMed Central journal article supplement (PMC3356477)
Supplement: NIHMS362754-supplement-1_si_001.pdf [file NIHMS362754-supplement-1_si_001.pdf]

**Supplemental Information for:**

A chemical screen identifies class A G-protein coupled receptors as regulators of cilia

Prachee Avasthi<sup>1</sup>, Aaron Marley<sup>2</sup>, Henry Lin<sup>3</sup>, Elisabet Gregori-Puigjane<sup>3</sup>, Brian K. Shoichet<sup>3</sup>  
Mark von Zastrow<sup>2</sup>, and Wallace F. Marshall<sup>1\*</sup>

1. Dept. of Biochemistry & Biophysics, UCSF

2. Dept. of Psychiatry, UCSF

3. Dept. of Pharmaceutical Chemistry, UCSF

\*Corresponding Author: Wallace F. Marshall, Department of Biochemistry and Biophysics, GH-N372F, UCSF, 600 16th St. San Francisco, CA 94158, (415) 514-4304,

[wallace.marshall@ucsf.edu](mailto:wallace.marshall@ucsf.edu)

## Supporting Figures:

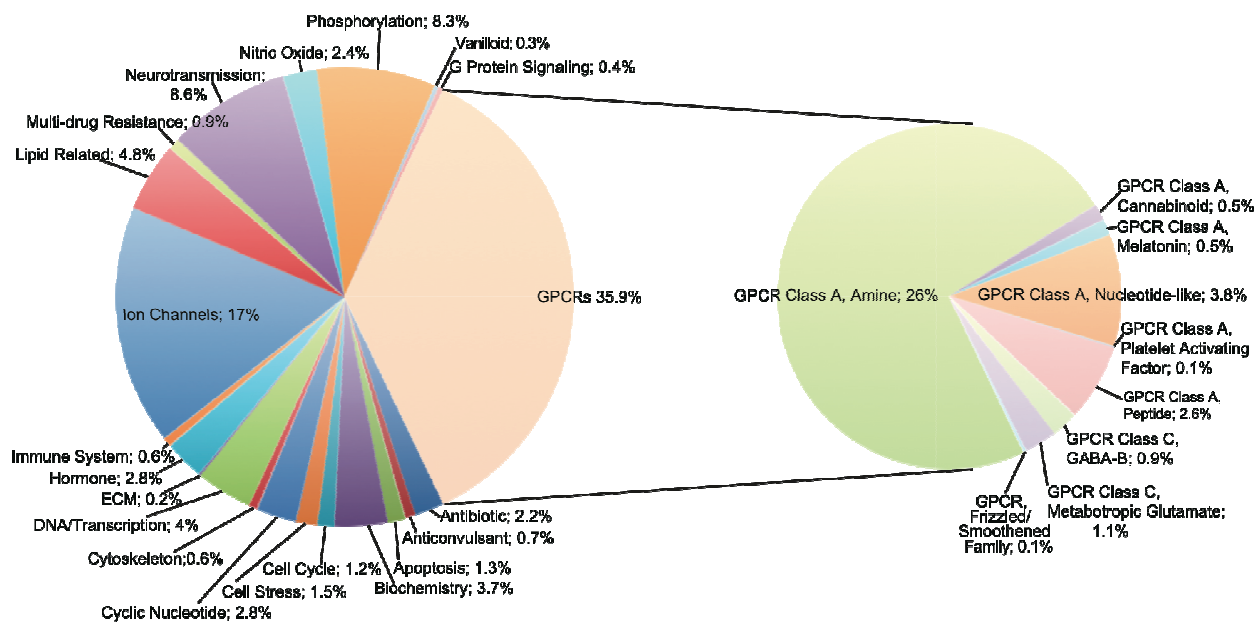

**Supplementary Figure 1** Distribution of drug targets in LOPAC1280 library

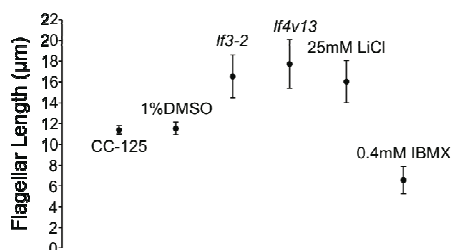

**Supplementary Figure 2** Validation of method to identify changes in flagellar length at N=10. Compounds known to alter flagella length like IBMX and LiCl along with flagellar length mutants *If3* and *If4* have significantly altered flagellar length. Error bars are 95% confidence intervals.

Supporting Tables are in tabs of a single excel file entitled

“Avasthi\_Marshall\_Supporting\_Tables\_ACSCB”:

**Supplementary Table 1** Shortening Factors for All Compounds

**Supplementary Table 2** Compounds Inducing Short Flagella

**Supplementary Table 3** Compounds Resulting in Flagella-less Cells

**Supplementary Table 4** Cytotoxic Compounds

**Supplementary Table 5** Compounds Activating the Flagellar Autotomy Pathway

**Supplementary Table 6** Compounds Clustered by Phenotypic Signature
